# Supplementary material for: Functional Characterization of Soybean Glyma04g39610 as a Brassinosteroid Receptor Gene and Evolutionary Analysis of Soybean Brassinosteroid Receptors
Source: MDPI journal article supplement (doi:10.3390/ijms17060897), 2016-06-07
Supplement: s1 [file s1]

# SupplementaryMaterials: Functional Characterization of Soybean *Glyma04g39610* as a Brassinosteroid Receptor Gene and Evolutionary Analysis of Soybean Brassinosteroid Receptors

Suna Peng, Ping Tao, Feng Xu, Aiping Wu, Weige Huo and Jinxiang Wang

**Table S1.** Sequence finger prints of the LLR domains in GmBRI1b. The cysteine residues in position 1 to 24 are shown in blue.

| LRR | beg | 1 | 2 | 3 | 4 | 5 | 6 | 7 | 8 | 9  | 10 | 11 | 12 | 13 | 14 | 15 | 16 | 17 | 18 | 19 | 20 | 21 | 22 | 23 | 24 | end | No. res |
|-----|-----|---|---|---|---|---|---|---|---|----|----|----|----|----|----|----|----|----|----|----|----|----|----|----|----|-----|---------|
| 1   | 47  | L | T | S | I | D | L | S | S | V  | P  | L  | S  | T  | N  | L  | T  | V  | I  | A  | S  | F  | L  | L  | S  | 70  | 24      |
| 2   | 71  | L | D | H | L | Q | S | L | S | LK | S  | T  | N  | L  | S  | G  | P  | A  | A  | M  | P  | P  | L  | S  | H  | 95  | 25      |
| 3   | 99  | S | S | S | L | T | S | L | D | L  | S  | Q  | N  | S  | L  | S  | A  | S  | L  | N  | D  | M  | S  | FL | AS | 124 | 26      |
| 4   | 125 | C | S | N | L | Q | S | L | N | L  | S  | S  | N  | L  | L  | Q  | F  | G  |    | P  | P  | P  | H  | W  | K  | 146 | 22      |
| 5   | 148 | L | H | H | L | R | F | A | D | F  | S  | Y  | N  | K  | I  | S  | G  | P  | G  | V  | V  | S  | WL | LN | P  | 173 | 26      |
| 6   | 174 | V | I | E | L | L | S | L | K | G  | N  | K  | V  | T  | G  | E  | T  | D  |    |    |    |    | F  | S  | G  | 193 | 20      |
| 7   | 194 | S | I | S | L | Q | Y | L | D | L  | S  | S  | N  | N  | F  | S  | V  | T  | L  | P  | T  |    | F  | G  | E  | 216 | 23      |
| 8   | 217 | C | S | S | L | E | Y | L | D | L  | S  | A  | N  | K  | Y  | L  | G  | D  | I  | A  | R  | T  | L  | S  | P  | 240 | 24      |
| 9   | 241 | C | K | S | L | V | Y | L | N | V  | S  | S  | N  | Q  | F  | S  | G  | P  | V  | P  |    |    | S  | L  | P  | 262 | 22      |
| 10  | 263 | S | G | S | L | Q | F | V | Y | L  | A  | A  | N  | H  | F  | H  | G  | Q  | I  | P  | L  | S  | L  | AD | L  | 287 | 25      |
| 11  | 288 | C | S | T | L | L | Q | L | D | L  | S  | S  | N  | N  | L  | T  | G  | A  | L  | P  | G  | A  | F  | G  | A  | 311 | 24      |
| 12  | 312 | C | T | S | L | Q | S | L | D | I  | S  | S  | N  | L  | F  | A  | G  | A  | L  | P  | M  | SV | L  | T  | Q  | 336 | 25      |
| 13  | 337 | M | T | S | L | K | E | L | A | V  | A  | F  | N  | G  | F  | L  | G  | A  | L  | P  | E  | S  | L  | S  | K  | 360 | 24      |
| 14  | 361 | L | S | A | L | E | L | L | D | L  | S  | S  | N  | N  | F  | S  | G  | S  | I  | P  | A  | S  | L  | C  |    | 383 | 23      |
| 15  | 392 |   | N | N | L | K | E | L | Y | L  | Q  | N  | N  | R  | F  | T  | G  | F  | I  | P  | P  | T  | L  | S  | N  | 414 | 22      |
| 16  | 415 | C | S | N | L | V | A | L | D | L  | S  | F  | N  | F  | L  | T  | G  | T  | I  | P  | P  | S  | L  | G  | S  | 438 | 24      |
| 17  | 439 | L | S | N | L | K | D | F | I | I  | W  | L  | N  | Q  | L  | H  | G  | E  | I  | P  | Q  | E  | L  | M  | Y  | 462 | 24      |
| 18  | 463 | L | K | S | L | E | N | L | I | L  | D  | F  | N  | D  | L  | T  | G  | N  | I  | P  | S  | G  | L  | V  | N  | 486 | 24      |
| 19  | 487 | C | T | K | L | N | W | I | S | L  | S  | N  | N  | R  | L  | S  | G  | E  | I  | P  | P  | W  | I  | G  | K  | 510 | 24      |
| 20  | 511 | L | S | N | L | A | I | L | K | L  | S  | N  | N  | S  | F  | S  | G  | R  | I  | P  | P  | E  | L  | G  | D  | 534 | 24      |
| 21  | 535 | C | T | S | L | I | W | L | D | L  | N  | T  | N  | M  | L  | T  | G  | P  | I  | P  | P  | E  | LF | K  | Q  | 559 | 25      |
| 22  | 629 |   | S | M | I | F | L | D | I | S  | H  | N  | M  | L  | S  | G  | S  | I  | P  | K  | E  | I  | G  | A  |    | 650 | 22      |
| 23  | 651 | M | Y | Y | L | Y | I | L | N | L  | G  | H  | N  | N  | V  | S  | G  | S  | I  | P  | Q  | E  | L  | G  | K  | 674 | 24      |
| 24  | 675 | M | K | N | L | N | I | L | D | L  | S  | N  | N  | R  | L  | E  | G  | Q  | I  | P  | Q  | S  | L  | T  | G  | 698 | 24      |
| 25  | 699 | L | S | L | L | T | E | I | D | L  | S  | N  | N  | L  | L  | T  | G  | T  | I  | P  | E  | S  |    | G  | Q  | 721 | 23      |

**Table S2.** List of the quality criteria parameters in automatic modeling with modeller v9.10 at ModWeb (<http://modbase.compbio.ucsf.edu/ModWeb20-html/modweb.html>) [56].

| Gene Name | Target Region | Protein Length | Template PDB Code | Template Region | Sequence Identity | E-Value | GA341 | MPQS    | z-DOPE | TSVMod Method | TSVMod RMSD | TSVMod NO35 |
|-----------|---------------|----------------|-------------------|-----------------|-------------------|---------|-------|---------|--------|---------------|-------------|-------------|
| GmBRI1a   | 21–761        | 762            | 3RGZ              | 30–770          | 60.00%            | 0       | 1.00  | 1.73604 | −0.97  | MSRED         | 2.024       | 0.84        |
| GmBRI1b   | 3–744         | 745            | 3RGZ              | 30–770          | 60.00%            | 0       | 1.0   | 1.75347 | −0.93  | MSALL         | 1.006       | 0.913       |
| GmBRL1a   | 68–824        | 825            | 3RGX              | 34–770          | 41.0%             | 0       | 1.00  | 1.39568 | −0.38  | MSRED         | 8.004       | 0.612       |
| GmBRL1b   | 65–808        | 809            | 3RGX              | 50–770          | 44.00%            | 0       | 1.0   | 1.41525 | −0.45  | MSRED         | 2.051       | 0.8         |
| GmBRL2a   | 34–724        | 725            | 3RGX              | 31–770          | 43.0%             | 0       | 1.0   | 1.4216  | −0.49  | MSRED         | 4.557       | 0.707       |
| GmBRL2b   | 35–725        | 726            | 3RGX              | 31–770          | 43.00%            | 0       | 1.0   | 1.41229 | −0.43  | MSRED         | 5.131       | 0.645       |

**Table S3.** List of primers used in this study.

| Primer Name           | Sequence (5'-3')                    | Usage                       |
|-----------------------|-------------------------------------|-----------------------------|
| GmBRI1b.F             | ATGAAAGCTCTGTACTACAGAAGCT           | Full <i>GmBRI1b</i> cloning |
| GmBRI1b.R             | ATGCTTGCTCAATTCAGGGGC               | Full <i>GmBRI1b</i> cloning |
| GmBRI1b.F1            | GATGGCAATGTTCAAGGAGATTCAGGCG        | sequencing                  |
| GmBRI1b.F2            | CGAGTGTTCTTCGCTTGAGT                | sequencing                  |
| GmBRI1b.R1            | AATCCCTGTCCCCTTGTCGCTAA             | sequencing                  |
| GmBRI1b.R2            | CACATCCCCAAACCCGCCAGAGCCA           | sequencing                  |
| GmEF1α.F              | CTGGAGGTTTTGAGGCTGGTAT              | qRT-PCR                     |
| GmEF1α.R              | CCAAGGGTGAAAGCAAGAAGA               | qRT-PCR                     |
| qGmBRI1b.F            | TTGAAATGGTGGAGATGAGCA               | qRT-PCR                     |
| qGmBRI1b.R            | AGGGGAGCTGAATCCGTCA                 | qRT-PCR                     |
| qCPD.F                | TTGCTCAACTCAAGGAAGAG                | qRT-PCR                     |
| qCPD.R                | TGATGTTAGCCACTCGTAGC                | qRT-PCR                     |
| qDWF4.F               | CATAAAGCTCTTCAGTCACGA               | qRT-PCR                     |
| qDWF4.R               | CGTCTGTTCTTTGTTTCCTAA               | qRT-PCR                     |
| qBR6ox1.F             | TCCCGTATCGGAGTCTTTGGT               | qRT-PCR                     |
| qBR6ox1.R             | TGGCCAATCTTTGGCGAA                  | qRT-PCR                     |
| qBR6ox2.F             | CAATAGTCTCAATGGACGCAGAGT            | qRT-PCR                     |
| qBR6ox2.R             | AACCGCAGCTATGTTGCATG                | qRT-PCR                     |
| qAtEF1a.F             | GTCGATTCTGGAAAGTCGAC                | qRT-PCR                     |
| qAtEF1a.R             | AATGTCAATGGTGATACCACGC              | qRT-PCR                     |
| GmBRI1bGFP.f          | ATCGTCGACGATGAAAGCTCTGTACTACAGAAGCT | Subcellular localization    |
| <i>GmBRI1b</i> .GFP.r | AAGCCCGGGCATGCTTGCTCAATTCAGGGGC     | Subcellular localization    |
| OX-GmBRI1b.F          | ATCGTCGACATGAAAGCTCTGTACTACAGAAGCT  | overexpression              |
| OX-GmBRI1b.R          | AAGCCCGGGATGCTTGCTCAATTCAGGGGC      | Overexpression              |
| GmBRI1b.RACE1         | AATCCCTGTCCCCTTGTCGCTAA             | 5'RACE                      |
| GmBRI1b.RACE2         | CACATCCCCAAACCCGCCAGAGCCA           | 5'RACE                      |
| GmBRI1b.RACE3         | GATGGCAATGTTCAAGGAGATTCAGGCG        | 3'RACE                      |
| GmBRI1b.RACE4         | CGAGTGTTCTTCGCTTGAGT                | 3'RACE                      |
| GmBRI1a.qF            | TCCTCCTCATTAACCTCCCT                | qRT-PCR                     |
| GmBRI1a.qR            | TTGAGAAGCCAAGAAACGAC                | qRT-PCR                     |
| GmBRI1b.qF            | AACCTCCAATCCCTCAACCTC               | qRT-PCR                     |
| GmBRI1b.qR            | TTTGTGTCCTTTGAGAGAGA                | qRT-PCR                     |
| GmBRL1a.qF            | GTATGATCTACCTTGACCTTTCC             | qRT-PCR                     |
| GmBRL1a.qR            | AAGAAAGACCCTCCAATGCC                | qRT-PCR                     |
| GmBRL1b.qF            | AACAAACTAACGGGTCAACTCAG             | qRT-PCR                     |
| GmBRL1b.qR            | GAAGTAGATTCTTGACGAACC               | qRT-PCR                     |
| GmBRL2a.qF            | AATGACAACAGCCAAACCAC                | qRT-PCR                     |
| GmBRI2a.qR            | AAACCACCACACCCAATGAG                | qRT-PCR                     |
| GmBRL2b.qF            | CAAGAATGATAACAGCCAACCC              | qRT-PCR                     |
| GmBRI2b.qR            | AGCAACAGAGATGAGAATTCCC              | qRT-PCR                     |

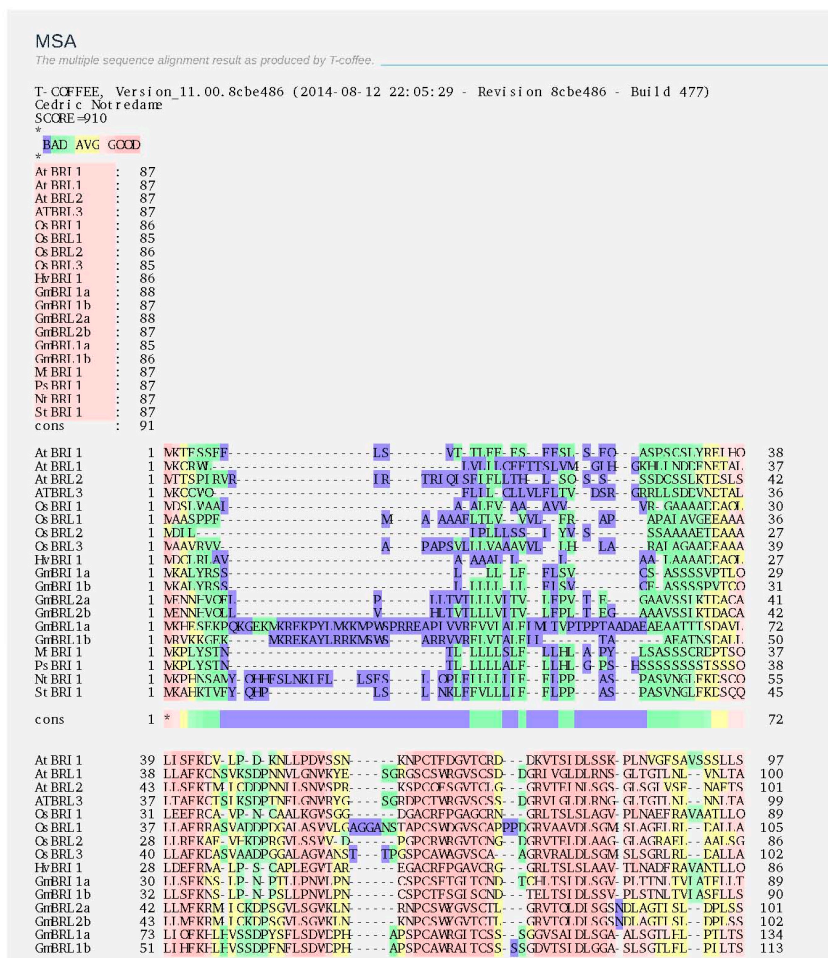

Figure S1. Cont.

|           |     |                                                                               |     |
|-----------|-----|-------------------------------------------------------------------------------|-----|
| M BRI 1   | 38  | LLNFRCS-LP-N-PSLLHNLVLPN-----NNPCSFTGTCNO--TTITSDLTSL-PLNINLTTITTYLLT         | 96  |
| Ps BRI 1  | 39  | LLYFRCS-LP-N-PSLLHDLVLPY-----KNPCSFTGTCNO--TTVTSLDLTSL-PLNINLTVAVATYLLT       | 97  |
| Nt BRI 1  | 56  | LI.SFRSS-LP-NCTCTI.ONVLS-----TDPCSFTGVSCRN--SRVSSI.DTNT-FI.SVDFTI.VSSVYI.G    | 115 |
| St BRI 1  | 46  | LLSFKAA-LP-PTPILLQNVLP-----TDPCSFTGVSCRN--SRVSSIDLNT-FLSVDFLSVTSYLLP          | 105 |
| cons      | 73  | * * : : * * : * : * : : : *                                                   | 144 |
| At BRI 1  | 98  | ITGIFSLFINSNH-INGSV-----SGFKCSASITSLDIRNS-LSGP-VTTLTSL-GSCSGIKFLNVSSNT        | 159 |
| At BRI 1  | 101 | LPNLONLYLOGNY-FSSGGDS-----SGSDCYLCVLDLSSNS-LSDYSMVD-YVF-SKCSNLVSVNI-SNNK      | 162 |
| At BRI 2  | 102 | LDSTSVIKISFNF-FVINS--T-SLI.I.PI.TI.THIFISSG-IIGT-IPF-NFF-SKYNSI.I.SITISYNN    | 163 |
| At BRI 3  | 100 | LSNI.RSIVIOGNN-FSSGDS-----SSSGCSI.FVLDLSSNS-ITDSIVD-YVF-STCI.NI.VSVNFSHNK     | 161 |
| Os BRI 1  | 90  | LGSVEVLSLRGAN-VSGAL--SAAGGARCGSKLCALDLSGNAALRGS-VALVAALASACGGLKTLNLSGDA       | 156 |
| Os BRI 1  | 106 | LPALORLNLRGNA-FYGNLSH-A--APSPPCALVEVDLSSNA-LNGT-LPP-SFL-APCGVLSRVNLSRNG       | 168 |
| Os BRI 2  | 87  | ITDTICRINI.SGNGEIHVDA--G-DIVKIPRAI.I.OIDSDGG-IAGR-IPD-GFI-ACYPNI.TT.VSIARNN   | 149 |
| Os BRI 3  | 103 | LSALRRLLDRGNA-FHGDLSR-IGSPRRAAPCALVEVDLSSNT-FNGT-LPR-AFL-ASCGGLOTLNLSRNS      | 168 |
| Hv BRI 1  | 87  | LSAVERLSLRGAN-VSGAL--A--AACCGKLEELDLSGNAALRGS-VALVAALASCGALRTLNLSGDA          | 150 |
| Gn BRI 1a | 90  | ITDN.OSTISIKSTN-LSGPAAMPPI.SHSKCASTITSLDIRSONA-LSGS-INTASFI-SSCSNI.OSTISIKSTN | 157 |
| Gn BRI 1b | 91  | LDHLOSLSLKSTN-LSGPAAMPPI.SHSKCSSTLSDLSONS-LSAS-LNDSFL-ASCSNLKSLNLSNL          | 157 |
| Gn BRI 2a | 102 | LDL.SVLKMSLNS-FSVNS--T-SLLNLPYSLTOLDLDFGG-VTGP-VPE-NLF-SKCPNLVVNLVSYNN        | 163 |
| Gn BRI 2b | 103 | ITDM.SVLIKISINS-FSVNS--T-SLVNIPYSITOIDLDFGG-VTGP-VPE-NLF-SKCPNLVVNLVSYNN      | 164 |
| Gn BRI 1a | 135 | ISSI.OI.IIRGNS-FSSFNLT-----VSPICITITITSHNN-FSGK-FPF-ANF-APCIRISYINISNNI       | 195 |
| Gn BRI 1b | 114 | LDPSLONILRGNS-FSSFNLT-----VSPICITITITSHNN-FSGK-FPF-ADF-APCNRISYINISNNI        | 174 |
| M BRI 1   | 97  | IPHI.OITIKSTN-ITSSPP--IPITHTKCTTTITSLDIRNT-LSGS-FSTLSFI-STCISIKSINISNNI       | 162 |
| Ps BRI 1  | 91  | LDHLOSLSLKSTN-ITSSPP--ISLHTKCTTTITSLDIRNT-LSGS-FSTLSFI-STCISIKSINISNNI        | 162 |
| Nt BRI 1  | 116 | LSNLESLVLKNAN-LSGSL--TSAAKSCCGVLSNIDLAENT-LSGP-VSEISSF-GACSNLKSLSNLSKNL       | 180 |
| St BRI 1  | 106 | LSNLESLVLKNAN-LSGSL--TSAAKSCCGVLSNIDLAENT-LSGP-ISEISSF-GVCSNLKSLSNLSKNL       | 170 |
| cons      | 145 | * : * : : * : : : : * : : : : *                                               | 216 |
| At BRI 1  | 160 | LDFPGKVS--GGLKLSLEVLDSLANSISGANVVGWLSGCGGELKHLAISGNKISGDVDV--SRC---           | 221 |
| At BRI 1  | 163 | LVGKIGFA--PSSLQSLTTVDLSYNI LS-----LSS-----                                    | 188 |
| At BRI 2  | 164 | FTGKLPN--DLP-----LSS-----                                                     | 176 |
| At BRI 3  | 162 | LAKLKSS--PSASNKRI.TTVDLSNNRFS-----LSS-----                                    | 188 |
| Os BRI 1  | 157 | VGAAGVCG--GGGFGAGIDSLDIRNNKIDTDSIRVWVD-----ACV-----                           | 197 |
| Os BRI 1  | 169 | IAAGGF--PFAPSLRSLDLRNLADAGLLNYSFA-GCHGVGYLNSANL.FAGRLPEL--AACSAVT             | 230 |
| Os BRI 2  | 150 | LTGELDG--ML-----A-----                                                        | 160 |
| Os BRI 3  | 169 | ITGGGY--PPPPSIRRIDMRNCISDAGIINYSIT-GCHKI.QYLNLSANQFTGSLPGL--APCTEVS           | 230 |
| Hv BRI 1  | 151 | VGAAGPAGGGGGGGAFAI.TAIDSSNKIACDADI.RVWVG-----AGI-----                         | 193 |
| Gn BRI 1a | 158 | LEFDSSH--WK-LHLLVAEFSYNKISGPGILPVLIN--PEI.EHLALKGNKVTGETDF--SGS--             | 212 |
| Gn BRI 1b | 158 | LCFGPPP--HMKLHLRFADFYNKISGPGVSVLLN--PVEILLSLKGNKVTGETDF--SGS--                | 214 |
| Gn BRI 2a | 164 | ITGPIPE--NFF-----CNS--                                                        | 176 |
| Gn BRI 2b | 165 | LTGPIPE--NFF-----CNS--                                                        | 177 |
| Gn BRI 1a | 196 | ITAGP--GPWPELAQLDLRNRVSDVLLVSA-L-GSSTLVFLNFSNKLACGLSETLVSKSLNLS               | 257 |
| Gn BRI 1b | 175 | ITAGI.VPG--PGWPPEIACDIDRNRVSDVLLVSA-L-GSSTLVFLNFSNKLACGLSETLVSKSLNLS          | 240 |
| M BRI 1   | 163 | LCFDSPK--WGLASSLSLSDENKISGPNFHHMLN--HELELLSLRGNKISGVTGETDF--SGY--             | 219 |
| Ps BRI 1  | 163 | LDSDSPK--WGLASSLSLSDENKISGPGFFVLLN--HELELLSLRGNKISGVTGETDF--SGY--             | 219 |
| Nt BRI 1  | 181 | MDPPSGEI--KASTFSIOIDISFNINISGONIPFVLSNRVFEI.FYFVSKGNKISAGNIPF--LTF--          | 241 |
| St BRI 1  | 171 | LDPPGKEI--LKGAIFSLQVLDLSYNNISGFNLFPWSSVGFGELEFFSLKGNKLAGSIPF--LDF--           | 232 |
| cons      | 217 | : : : : * : : : : *                                                           | 288 |
| At BRI 1  | 222 | -----VNI.FFIDVSSNNFSTGI--PFI-GTCSAIOHIDISGNKISGDFSRAT                         | 265 |
| At BRI 1  | 189 | -----DKIPESFISDFP-ASLKYL.DLTHNLSGDFS--DLSP-GICGNLTFFSLSONLSGLKFPITL           | 247 |
| At BRI 2  | 177 | -----KRI.OITIDSYNNITGPI.SGLTIP-SSCVSMYIDFSGNSISGY-LSIST                       | 224 |
| At BRI 3  | 189 | -----DEIPETFIADFP-NSIKHIDISGNNVTGDFS--RISF-GICGNLTFFSLSONLSGLRFPVSL           | 247 |
| Os BRI 1  | 198 | -----GAVRWLDLALNRI.SG-V--PEF-TNCSGLCYLLDLSGNLIVGE                             | 235 |
| Os BRI 1  | 231 | TLDSWNHMGGLPPGLVATAPANI.TYNTAGNNFTGDVS--GYDF-GGCANI.TVTDWYNGISSTRI.PPGI       | 299 |
| Os BRI 2  | 161 | -----SNIRSFIDVSGNNISGDIS--GV-SIPATTAVIDISGNRFTGA-IPPSI                        | 204 |
| Os BRI 3  | 231 | VLDDL.SWNL.MGVLPPRFVAMAPANLTYLSIAGNNFSMDIS--DYEF-GGCANLTLLDWYNNLRSLTGLPRSL    | 299 |
| Hv BRI 1  | 194 | -----GSVRWLDLAVNKISGGL--SDF-TNCSGLCYLLDLSGNLIVAGD                             | 232 |
| Gn BRI 1a | 213 | -----NSICFIDISNNFVSIT--PTR-GFCSSTFYITDISANKYFGD-IARTI                         | 256 |
| Gn BRI 1b | 215 | -----ISLOYLDLSSNNFVSIT--PTR-GECSSTFYITDISANKYFGD-IARTI                        | 258 |
| Gn BRI 2a | 177 | -----EKLQVLDLSYNNLSGPIF--GLKMECISLLQVLDLSDIS-IPLSL                            | 221 |
| Gn BRI 2b | 178 | -----EKLQVLDLSYNNLSGPIF--GLKMECISLLQVLDLSDIS-IPLSL                            | 222 |
| Gn BRI 1a | 258 | TTIDISYNI.FSGKVPPII.I-NEAVCMIDFSFNNESEFD--FGF-GSCFNIVRISFHNALSSNFFPRGI        | 321 |
| Gn BRI 1b | 241 | YLDLSYNVLSGKVPSSRLI-NEAVRVLDFSFNNESEFD--FGF-GSCFNIVRISFHNALSSNFFPRGI          | 304 |
| M BRI 1   | 220 | -----NNIRHIDISNNFVSIT--PSF-GFCSSTFYITDISANKYFGD-IARTI                         | 263 |
| Ps BRI 1  | 220 | -----TTIRYIDISNNFVSIT--PSF-GFCSSTFYITDISANKYFGD-IARTI                         | 263 |
| Nt BRI 1  | 242 | -----TNLSYLDLSANNFSTGF--PSF-KDCSNLEHLLDLSNKFYGD-IGASL                         | 285 |
| St BRI 1  | 233 | -----KNLSHLLDLSANNFSTVF--PSF-KDCSNLQHLDLSNKFYGD-IGSSL                         | 276 |
| cons      | 289 | : : : : * : : : : *                                                           | 360 |
| At BRI 1  | 266 | STCTFIRKIDINISNOF-VGPI.PPI--PIKSI.OYI.SIAFNKFTGEPIDFIS-GACTIT.TGIDISGNHFGA    | 331 |
| At BRI 1  | 248 | PNCKFI.FITNISNNI-AGKIPNGEYVGSFCNISKI.SIAHNRI.SGPI.PPEIS-I.IKCTIVIIDISGNIFSGF  | 317 |
| At BRI 2  | 225 | INCTNLKSLNLSYNNF-DGOIPRS--FGELKLLCSLDLSHNRLTGWIPPEIG-DICRSLONLRLSYNNFTGV      | 292 |
| At BRI 3  | 248 | SNCKLLETNLNRSL-I.GKIPGLYVGNFCNLRQLSLAHNLSYGEIPPEIS-LLCRTLVLVLDLSGNISLIGO      | 317 |
| Os BRI 1  | 236 | -----VPCGAI-SDCRGIVKINISFNHAGV                                                | 260 |
| Os BRI 1  | 300 | INCRRLLETLEMBGNKLSGALPTF--LVGFSSLRRLLAGNEFTGAI.PVELG-OLCGRI.VELDLSNRLVGA      | 368 |
| Os BRI 2  | 205 | SGCAGLTITLNL.SYNGI-AGAI.PEG-I.GAIGLEVLVDSWNHITGAI.PPGLGRNACASLRVLVSSNNISGS    | 273 |

Figure S1. Cont.

|         |     |                     |                  |                             |                |                       |             |               |                 |                    |               |              |        |         |       |          |         |        |        |       |       |       |     |     |
|---------|-----|---------------------|------------------|-----------------------------|----------------|-----------------------|-------------|---------------|-----------------|--------------------|---------------|--------------|--------|---------|-------|----------|---------|--------|--------|-------|-------|-------|-----|-----|
| Os BRL3 | 300 | VDCRRLEALDMSGNKL    | SGPI PTF         | LVEL QALRRLSLAGNRTGEI       | SDKLS          | ILCKTLVELDLSSNNLI     | GS          | 368           |                 |                    |               |              |        |         |       |          |         |        |        |       |       |       |     |     |
| Hv BRL1 | 233 |                     |                  |                             | VAAL           | SGGRSLRALNLSSNNHL     | AGA         | 257           |                 |                    |               |              |        |         |       |          |         |        |        |       |       |       |     |     |
| GnBRL1a | 257 | SPCKNI.VYI.NFSSNOF  | SGPVPSI          | PSGSI CFVYI ASNHFGQI        | PI PI A        | DL CSTI I.CI.DI SSNNI | SGA         | 322           |                 |                    |               |              |        |         |       |          |         |        |        |       |       |       |     |     |
| GnBRL1b | 259 | SPCKSI.VYI.NVSSNOF  | SGPVPSI          | PSGSI CFVYI AANHFHGOI       | PI SI A        | DL CSTI I.CI.DI SSNNI | TGA         | 324           |                 |                    |               |              |        |         |       |          |         |        |        |       |       |       |     |     |
| GnBRL2a | 222 | SNCTSLKLI LNANMM    | SGDI PKA         | FGCLNKL DTL SHNOLNGW        | PSEFG          | NACASLLEKL SFNNI      | SGS         | 289           |                 |                    |               |              |        |         |       |          |         |        |        |       |       |       |     |     |
| GnBRL2b | 223 | SNCTSI.KNI.NI.ANNM  | SGDI PKA         | FGCLNKL CTTI.DI SHNOI I     | GW PSEFG       | NACASTI I.FI.KI SFNNI | SGS         | 290           |                 |                    |               |              |        |         |       |          |         |        |        |       |       |       |     |     |
| GnBRL1a | 232 | GNONNI.FVI.DI SHNEI | MMFI PSE         | ITLI.NI.KSI.KSI.FI AHNFSGEI | PSEI.G         | SI CKTI VFI.DI SFNNI  | SGS         | 390           |                 |                    |               |              |        |         |       |          |         |        |        |       |       |       |     |     |
| GnBRL1b | 305 | SNONNLVL.DL SHNEF   | AMEI PSE         | LLVSLKSLKSLFLAHNFSGEI       | PSELG          | GL CETLVELDLSENKLS    | SGS         | 373           |                 |                    |               |              |        |         |       |          |         |        |        |       |       |       |     |     |
| M BRL1  | 264 | SPCKNLHL.NVSGNCF    | TGPVPEL          | PSGSLKFVFLAANHFSGEI         | PKI PARLA      | ELCSTLVELDLSSNNLTGD   |             | 329           |                 |                    |               |              |        |         |       |          |         |        |        |       |       |       |     |     |
| Ps BRL1 | 264 | SPCKNI.I.H.NI.SGNCF | TGPVPSI          | PSGSI CFYI YI AFNFHAGKI     | PARI A         | DL CSTI VFI.DI SSNNI  | TGP         | 329           |                 |                    |               |              |        |         |       |          |         |        |        |       |       |       |     |     |
| Nt BRL1 | 286 | SSCGKLSFLNLNNQF     | VGL VPKL         | PSESLQFVFLYLRGNDFQGVY       | PQOLA          | DLCKTVVELDL SFNNFSG   | L           | 351           |                 |                    |               |              |        |         |       |          |         |        |        |       |       |       |     |     |
| St BRL1 | 277 | SSCGKLSFLNLNNQF     | VGL VPKL         | CSESLQVFLYLRGNDFQGVY        | PQOLA          | DLCKTVVELDL SYNNFSGM  |             | 342           |                 |                    |               |              |        |         |       |          |         |        |        |       |       |       |     |     |
| cons    | 361 |                     |                  |                             |                |                       |             | 432           |                 |                    |               |              |        |         |       |          |         |        |        |       |       |       |     |     |
| At BRL1 | 332 | VPPFFGSCSLLESAL     | SSNNFSGEL        | PMDTLLKMRGLKVL              | DL SFNEFSGELPE | - SLTNLS              | ASLLTDLSSNN | 401           |                 |                    |               |              |        |         |       |          |         |        |        |       |       |       |     |     |
| At BRL1 | 318 | LPSSOTACVWQNI       | NI.GNNYI         | SGDFI TVVUSKI               | TGI VYI        | VYAYNNI               | SGSVPI      | - SI TNCS     | NI RVFI.DI SSNG | 386                |               |              |        |         |       |          |         |        |        |       |       |       |     |     |
| At BRL2 | 293 | LPESLSGSCVLSL       | DLSSNNI          | SGPFPNTI                    | LRSGFSGLI      | LLLSNNLI              | SGDFPT      | - SI SACK     | SLRI ADFSSNR    | 361                |               |              |        |         |       |          |         |        |        |       |       |       |     |     |
| AtBRL3  | 318 | LPQSFSTCGSLOSL      | LNQNLK           | SGDFLS                      | TVSVKSL        | RI TNLY               | LPFNFI      | SGSVPI        | - SLTNCS        | NI LRVLVDI SSNG    | 386           |              |        |         |       |          |         |        |        |       |       |       |     |     |
| Os BRL1 | 261 | FDPDI ACI.TSI.NAI   | NI SSNNFSGEI     | PGCAF AKI                   | COI TAI        | SI SI SFNHFNGSI       | PD          | - TVASI P     | FI COI.DI SSNT  | 329                |               |              |        |         |       |          |         |        |        |       |       |       |     |     |
| Os BRL1 | 369 | LPASFAKCKSI         | FVI.DI GNNQI     | ACGFVASVSTI                 | ASI RF         | RI SFNNI              | TGVNDI      | PVLAAGCP      | - I.FVI.DI GSNE | 432                |               |              |        |         |       |          |         |        |        |       |       |       |     |     |
| Os BRL2 | 274 | LPESLSCHARLL        | LDVANNQSGEI      | PAAVLGNL                    | TAVESLL        | SSNNI                 | SGSLPD      | - TI AHCK     | NI RVAIDLSSNK   | 349                |               |              |        |         |       |          |         |        |        |       |       |       |     |     |
| Os BRL3 | 369 | LPASFGCGRFI         | QVI.DI GNNQI     | SGDFVETVI                   | TNI SSI        | RVI RI PFNNI          | TGANDI      | PAI           | ASRCP           | - I.FVI.DI GSNE    | 439           |              |        |         |       |          |         |        |        |       |       |       |     |     |
| Hv BRL1 | 258 | FDPNI ACI.TSI.TAI   | NI SSNNFSGE      | VPADAFGT                    | COI OSI        | SI SI SFNHFSGSI       | PD          | - SVAAI P     | DI FVI.DI SSNN  | 326                |               |              |        |         |       |          |         |        |        |       |       |       |     |     |
| GnBRL1a | 323 | LPEAFGACTSL         | SDSI             | SSNLFAGAL                   | PMVLTOMKSL     | KELAVAFNAFL           | GPLPE       | - SLTKLS      | TLES            | LDLSSNL            | 391           |              |        |         |       |          |         |        |        |       |       |       |     |     |
| GnBRL1b | 325 | LPGAFGACTSL         | SDSI             | SSNLFAGAL                   | PMVLTOMKSL     | KELAVAFNAFL           | GPLPE       | - SLTKLS      | AL              | ELLDLSSNN          | 393           |              |        |         |       |          |         |        |        |       |       |       |     |     |
| GnBRL2a | 291 | LPSPFSSSCV          | QO.I.DI SSNNM    | GGCOPDAI                    | FONI           | SGSI OFI              | RI GNNAI    | TGQFSS        | - SI SSCK       | KI KI VDFSSNK      | 358           |              |        |         |       |          |         |        |        |       |       |       |     |     |
| GnBRL2b | 291 | LPSPGSSCTV          | QLLDI            | SSNNM                       | GGCOPDAI       | FONI                  | SGSI OFI    | RI GNNAI      | TGQFSS          | - SI SSCK          | KI KI VDFSSNK | 359          |        |         |       |          |         |        |        |       |       |       |     |     |
| GnBRL1a | 391 | LPLSFTCCSSLOSL      | ARNARY           | SGNFI                       | VS             | VNKL RSLKY            | NAAFNNI     | TGPVPS        | - SLVSSK        | EL RVLDI SSNNR     | 459           |              |        |         |       |          |         |        |        |       |       |       |     |     |
| GnBRL1b | 374 | LPLSFTCCSSLOSL      | ARNARY           | SGNFI                       | VS             | VNKL RSLKY            | NAAFNNI     | TGPVPS        | - SLVSSK        | NI KI RVFI.DI SSNR | 443           |              |        |         |       |          |         |        |        |       |       |       |     |     |
| M BRL1  | 330 | LPREFGACTSI         | TSFDI            | SSNIFAGCI                   | OVFI           | VFMSI                 | KFI         | SVAFNDFVGPVPI | - SI SKI T      | GL I.FI.DI SSNN    | 398           |              |        |         |       |          |         |        |        |       |       |       |     |     |
| Ps BRL1 | 330 | LPREFGACTSVTSF      | SDSI             | SSNIFAGCM                   | PEVLI          | TEMNSL                | KEL         | TVAFNEFAGLPE  | - SL SKLT       | GL                 | ESLDLSSNN     | 398          |        |         |       |          |         |        |        |       |       |       |     |     |
| Nt BRL1 | 352 | VPENI GACCSI        | RFI.DI SSNNFSGEI | PVDITI                      | I.KI           | SNL                   | IKTMI       | SFNNFI        | GGI             | PF                 | - SFSNI I     | KI FTDI SSNN | 420    |         |       |          |         |        |        |       |       |       |     |     |
| St BRL1 | 343 | VPESLGCSSLELD       | VDI              | SSNNFSGEL                   | PVDITL         | KL                    | SNMKTML     | SFNKFGVGL     | PD              | - SFSNLL           | KL            | ETLDVSSNN    | 411    |         |       |          |         |        |        |       |       |       |     |     |
| cons    | 433 |                     |                  |                             |                |                       |             |               |                 |                    |               |              | 504    |         |       |          |         |        |        |       |       |       |     |     |
| At BRL1 | 402 | FSGPI I.PNI.CCNP    | ---              | KNTI                        | CEI            | YI.ONNGFTGKI          | PPTI        | SNCSEI        | VSI             | FI                 | SFNVI         | SGTI         | PSGI   | SKI     | RDI   | 469      |         |        |        |       |       |       |     |     |
| At BRL1 | 387 | FTGVNVPFSG          | CLCS             | ---                         | SPVLEKI        | LI                    | ANNYLS      | SGTVPMEL      | GKCKSL          | KTI                | DL            | SFNELT       | TGPI   | PKFI    | WML   | PNLS     | SDL     | 455    |        |       |       |       |     |     |
| At BRL2 | 362 | FSGVI               | PPDI             | CPGA                        | ---            | ASI                   | FEI         | RI            | PDNI            | VTGFI              | PPAI          | SOCSEI       | RTI    | DI      | SI    | NYI      | NGTI    | PPI    | GNI    | CKI   | FCF   | 428   |     |     |
| AtBRL3  | 387 | FTGTVPSFG           | CFI.CS           | ---                         | SVI            | FKI                   | I.I         | ANNYI         | SGTVPMFI        | GKCKSI             | KTI           | DI           | SFNAI  | FTI     | I     | PKFI     | WML     | PKI    | SDI    | 457   |       |       |     |     |
| Os BRL1 | 330 | FSGTI               | PPDI             | CPGA                        | ---            | NSKL                  | H.LYI       | ONNYLTGGI     | PDVANSCTLS      | VLSLDL             | SLNY          | NGSI         | PASL   | GDLGN   | LOD   |          |         |        |        |       |       | 397   |     |     |
| Os BRL1 | 404 | LDGEI               | MPDI             | CSSL                        | ---            | PSLR                  | KLLP        | PNNYL         | NGTVPPSL        | GDCANLEI           | DL            | SFNLL        | VGKI   | PETI    | I     | RLPKI    | VDL     |        |        |       |       | 506   |     |     |
| Os BRL2 | 343 | ISGAI               | PAFI             | CPSG                        | ---            | AAI                   | FEI         | RI            | PDNI            | VAGTI              | PPGI          | SNCSEI       | RVI    | DFSI    | NYI   | RPGI     | PPFI    | GRI    | RAI    | FEI   |       | 409   |     |     |
| Os BRL3 | 404 | FDGEI               | MPDI             | CSSL                        | ---            | PSLR                  | KLLP        | PNNYI         | NGTVPPSL        | SNCVNLEI           | DL            | SFNLL        | VGSI   | PPFI    | L     | FLLK     | VDL     |        |        |       |       | 506   |     |     |
| Hv BRL1 | 327 | FSGSI               | PPDI             | CCDP                        | ---            | NSRL                  | RVLY        | LYI           | ONNYLS          | SGSI               | PEAVNSCTDL    | VLSLDL       | SLNY   | NGSI    | PESL  | GEL      | SRL     | LOD    |        |       |       | 394   |     |     |
| GnBRL1a | 392 | FSGSI               | PTTI             | CGGAD                       | NNNI           | I                     | KFI         | YI            | ONNRTGFI        | PPTI               | SNCSEI        | VAI          | DI     | SFNFI   | TGPI  | PSGI     | SKI     | RDI    |        |       |       | 462   |     |     |
| GnBRL1b | 394 | FSGSI               | PASTI            | CGGAD                       | AGLI           | NNNI                  | I           | KFI           | YI              | ONNRTGFI           | PPTI          | SNCSEI       | VAI    | DI      | SFNFI | TGPI     | PSGI    | SKI    | RDI    |       |       | 462   |     |     |
| GnBRL2a | 359 | YIGSI               | PRDI             | CPGA                        | ---            | VS                    | LEELR       | MPDNI         | I               | TGEI               | PAEL          | SKCSQ        | KTL    | DF      | SLNYL | NGTI     | PDGI    | GELEN  | LEO    |       |       | 425   |     |     |
| GnBRL2b | 360 | FYSGI               | PRDI             | CPGA                        | ---            | ASI                   | FEI         | RPDNI         | I               | TGKI               | PAFI          | SKCSQ        | KTI    | DF      | SI    | NYI      | NGTI    | PDGI   | GEI    | FN    | FCI   | 426   |     |     |
| GnBRL1a | 404 | FSGNVPSI            | CPG              | ---                         | I              | GE                    | NI          | I             | AGNYI           | SGTVPSQ            | GE            | CRNI         | KTI    | DF      | SFNFI | NGSI     | PQWVWAI | PN     | DI     |       |       | 524   |     |     |
| GnBRL1b | 444 | FSGNVPSI            | CPG              | ---                         | E              | LEKI                  | I           | L             | AGNYI           | SGTVPSQ            | GE            | CRNI         | KTI    | DF      | SFNFI | NGSI     | PQWVWAI | PN     | DI     |       |       | 508   |     |     |
| M BRL1  | 399 | FTGTI               | PRW              | CEEF                        | ---            | GNN                   | KEI         | YI            | ONNRTGFI        | PPTI               | SNCSEI        | VAI          | DI     | SFNFI   | TGPI  | PSGI     | SKI     | RDI    |        |       |       | 467   |     |     |
| Ps BRL1 | 399 | FTGTI               | PRW              | CEEF                        | ---            | GNN                   | KEI         | YI            | ONNRTGFI        | PPTI               | SNCSEI        | VAI          | DI     | SFNFI   | TGPI  | PSGI     | SKI     | RDI    |        |       |       | 467   |     |     |
| Nt BRL1 | 421 | ITGFI               | PSGI             | CKDP                        | ---            | N                     | S           | L             | KVLYI           | ONNRTGFI           | PPTI          | SNCSEI       | VAI    | DI      | SFNFI | TGPI     | PSGI    | SKI    | RDI    |       |       | 488   |     |     |
| St BRL1 | 412 | ITGVI               | PSGI             | CKDP                        | ---            | N                     | N           | L             | KVLYI           | ONNRTGFI           | PPTI          | SNCSEI       | VAI    | DI      | SFNFI | TGPI     | PSGI    | SKI    | RDI    |       |       | 479   |     |     |
| cons    | 505 |                     |                  |                             |                |                       |             |               |                 |                    |               |              |        |         |       |          |         |        |        |       |       | 576   |     |     |
| At BRL1 | 470 | KLWNLMEGEI          | POELMY           | -                           | VKTLET         | LI                    | LD          | FNDLT         | TGEI            | PSGL               | SNCNTNL       | NW           | SL     | SSNNRL  | TGEI  | PKW      | GRLEN   | LA     | I      |       |       | 540   |     |     |
| At BRL1 | 456 | VMANNI              | TGFI             | PEGVCG                      | KGGNI          | FTI                   | I           | NNNI          | I               | TGSI               | PSTI          | SRTCTM       | NI     | W       | SSNNI | TGKI     | PSGI    | GNI    | SKI    | AI    |       | 527   |     |     |
| At BRL2 | 429 | I                   | AWNNI            | AGEI                        | PEGI           | GR                    | -           | CLNKL         | LDI             | LNNNLT             | TGEI          | PEEFNCSNI    | EW     | SFNTS   | NRIT  | GTEVPKDF | GI      | LSRLAV |        |       |       | 499   |     |     |
| AtBRL3  | 456 | VMANNI              | TGFI             | PSTI                        | CEVDG          | GNLET                 | I           | LNNNLT        | TGSL            | PSTI               | SRTCTM        | NI           | W      | SSNNI   | TGKI  | PSGI     | GNI     | SKI    | AI     |       |       | 527   |     |     |
| Os BRL1 | 398 | I                   | WNNFI            | TGFI                        | PASTI          | SR                    | -           | ICG           | FHI             | I                  | TDYNGI        | TGSI         | PPFI   | AKCTKI  | NW    | SI       | ASNNI   | SGPI   | PSW    | GKI   | SYI   | 468   |     |     |
| Os BRL1 | 507 | VMANGI              | SGFI             | PSTI                        | CSNGT          | LI                    | FTI         | I             | VY              | SFNNTGSI           | PSSTI         | TRCVNI       | I      | W       | SI    | ASNNI    | TGSGV   | PGFG   | GKI    | AKI   | 478   |       |     |     |
| Os BRL2 | 410 | VMWF                | NGDI             | RADI                        | GO             | CRNL                  | RTI         | I             | NNNI            | I                  | GGDI          | PVFNCT       | GLEW   | SLT     | SNOI  | TGPI     | REFP    | GR     | LSRLAV |       |       | 580   |     |     |
| Os BRL3 | 507 | I                   | WANNI            | SGFI                        | PKPFC          | FNSTAI                | FTI         | I             | VY              | SFNNTGSI           | PSSTI         | TRCVNI       | I      | W       | SI    | ASNNI    | TGSGI   | PSFG   | GNI    | AKI   | 478   |       |     |     |
| Hv BRL1 | 395 | I                   | WNNI             | I                           | EGFI           | PASTI                 | SS          | -             | I               | PGI                | FHI           | I            | TDYNGI | TGSI    | PPFI  | AKCTKI   | NW      | SI     | ASNNI  | SGPI  | PSW   | GKI   | SYI | 465 |
| GnBRL1a | 463 | I                   | W                | NOL                         | HGEI           | POELMY                | -           | LKSELEN       | I               | LD                 | FNDLT         | TGNI         | PSGL   | VNCTKL  | NW    | SL       | SSNNRL  | TGEI   | PRW    | GR    | LSNL  | 533   |     |     |
| GnBRL1b | 466 | I                   | W                | NOL                         | HGEI           | POELMY                | -           | LKSELEN       | I               | LD                 | FNDLT         | TGNI         | PSGL   | VNCTKL  | NW    | SL       | SSNNRL  | TGEI   | PPW    | GR    | LSNL  | 536   |     |     |
| GnBRL2a | 426 | I                   | AWNNI            | EGSI                        | PPKI           | GO                    | ---         | CRNI          | KTI             | I                  | NNNI          | TGGI         | PI     | I       | F     | FNCSNI   | FW      | SI     | TSNFI  | SWFI  | PRKFI | FTI   | 496 |     |
| GnBRL2b | 427 | I                   | AW               | NLEGI                       | EPFI           | PKPI                  | GO          | ---           | CRNI            | KTI                | I             | NNNI         | TGGI   | PI      | I     | ELF      | FNCSNI  | FW     | SI     | TSNFI | SWFI  | PRKFI | FTI | 497 |
| GnBRL1a | 525 | I                   | W                | ANNI                        | TGFI           | PEGI                  | CEVG        | GNLET         | I               | LNNNLI             | I             | SGSI         | PKSI   | ANCTM   | NW    | W        | SSANNI  | TGFI   | TAGI   | GN    | NALAI | 596   |     |     |
| GnBRL1b | 509 | I                   | W                | ANNI                        | NGFI           | PEGI                  | CEVG        | GNLET         | I               | LNNNLI             | I             | SGSI         | PKSI   | ANCTM   | NW    | W        | SSANNI  | TGFI   | TAGI   | GN    | NALAI | 580   |     |     |
| M BRL1  | 468 | I                   | W                | NOL                         | HGEI           | POELMY                | -           | LKSELEN       | I               | LD                 | FNDLT         | TGNI         | PSGL   | VNCTKL  | NW    | SL       | SSNNRL  | TGEI   | PAW    | GR    | LSNL  | 538   |     |     |
| Ps BRL1 | 468 | I                   | W                | NOL                         | HGEI           | POELMY                | -           | LKSELEN       | I               | LD                 | FNDLT         | TGNI         | PSGL   | VNCTKL  | NW    | SL       | SSNNRL  | TGEI   | PAW    | GR    | LSNL  | 538   |     |     |
| Nt BRL1 | 489 | I                   | W                | NOL                         | SGFI           | POELMY                | -           | LKSELEN       | I               | LD                 | FNDLT         | TGSI         | PASTI  | SNCNTNI | NW    | W        | SSANNI  | I      | SGFI   | PASTI | GKI   | PNAI  | 559 |     |
| St BRL1 | 480 | I                   | W                | NOL                         | SGFI           | POELMY                | -           | LKSELEN       | I               | LD                 | FNDLT         | TGSI         | PASTI  | SNCNTNI | NW    | W        | SSANNI  | I      | SGFI   | PASTI | GKI   | PNAI  | 550 |     |
| cons    | 577 |                     |                  |                             |                |                       |             |               |                 |                    |               |              |        |         |       |          |         |        |        |       |       | 642   |     |     |

**Figure S1. Cont.**

[illegible]

**Figure S1. Cont.**

|         |      |                                                                               |      |
|---------|------|-------------------------------------------------------------------------------|------|
| GnBRL1b | 793  | RYENNSSLGCVPLP-ACGASKNHSV-----A-VG-DW-KKOCPPVAGVVI-GLLCFLVFALGLVLALYR         | 851  |
| M BRL1  | 751  | KFLNLSNGSGCVPLP-PCGKLTGANA-----ACHOKSH-RROASTAGSVAMGLFSLFCVFGLIITIAFE         | 811  |
| Ps BRL1 | 751  | KFLNLSNGSGCVPLP-PCGKLTSGGGA-----GSHRSH-RRCASTAGSVAMGLFSLFCVFGLIITIAFE         | 811  |
| Nt BRL1 | 772  | RFANTN-SL-CGYPLP-PCGSGVNSNS-----SCHOKSH-RROASTAGSVAMGLFSLFCVFGIIVATFE         | 831  |
| St BRL1 | 763  | RFANNT-SL-CGYPLP-PCGSGPKSDA-----NCHOKSH-RRQASLAGSVAMGLFSLFCVFGIIVATFE         | 823  |
| cons    | 865  | ::. . . * * * * *                                                             | 936  |
| At BRL1 | 817  | MKRRRRKKKEAF--LEM-YAEG-GNSGDR-TANNNTWKLT-G-VKEALSI-NLAAEFKPLRLKLTFAADLLQATNG  | 882  |
| At BRL1 | 799  | VRVK-ORFKCP--REK-YFESLPT-----SGGSSWKLS-S-VPEPLSI-NVATFEKPLRLKLTFAHILFATNG     | 858  |
| At BRL2 | 778  | VRRRRDAEDA--K-M-HSLPT-----VNSATTWKI-G-KFKPLSI-NVATFEORLRLKLTKEFSQIFATNG       | 837  |
| ATBRL3  | 798  | ARKV-CKKEKO--REK-YFESLPT-----SGGSSWKLS-S-VPEPLSI-NVATFEKPLRLKLTFAHLEATNG      | 857  |
| Os BRL1 | 740  | SKRRRLKNEEASTSDRI-YLISRSF-S-----ATMSDLWRNLS-GTNNLSI-NLAAEFKPLRLTLADILEATNG    | 806  |
| Os BRL1 | 852  | LRYN-OKTFEV--RTG-VYVESLPT-----SGT'SWKLS-S-G-VREPLSI-NVATFEKPLRLKLTFAHILFATNG  | 911  |
| Os BRL2 | 762  | ARARRVERSA--M-M-SSSLCDG-TTRTATWKL-G-KAEKALSI-NVATFEORLRLKLTFTQLILEATNG        | 823  |
| Os BRL3 | 851  | LWKFHNKTKE--I-OAGCSSELPG-----SSKSSWKLS-G-I-GEPLSI-NMAIFENPLRLKLTFSDLHATNG     | 912  |
| Hv BRL1 | 739  | SKRRLKNEEFASTSDRI-YLISRSF-S-----GTMSNWKLS-S-G-T-NAISI-NLAAEFKPLRLKLTGIVVFATNG | 802  |
| GnBRL1a | 808  | TKRRRRKKKEAA--LEA-YDGNLFS-----GPANVSWKLT-S-TREALSI-NLATEFKPLRLKLTFAADLLDATNG  | 870  |
| GnBRL1b | 811  | TKRRRRKKKEAA--LEA-YDGSFS-----GPANVSWKLT-S-TREALSI-NLATEFKPLRLKLTFAADLLDATNG   | 873  |
| GnBRL2a | 732  | -----TTNPSTDRRLRLKLTFSQILFATNG                                                | 755  |
| GnBRL2b | 777  | MRARRKFAFEV--K-I-LNSLQ-A-----CHAAITWKI-G-KFKPLSI-NVATFEORLRLKLTKEFSQIFATNG    | 836  |
| GnBRL1a | 868  | VRKT-ORKEEM--REF-YFESLPT-----SGGSSWKLS-S-FPEPLSI-NVATFEKPLRLKLTFAHLEATNG      | 927  |
| GnBRL1a | 852  | VRKA-ORKEEM--REF-YFESLPT-----SGGSSWKLS-S-FPEPLSI-NVATFEKPLRLKLTFAHILFATNG     | 911  |
| M BRL1  | 812  | TKRRRRKKKFAA--LDG-YLDNSHSG-----NANNSGWKT-T-SAREALSI-NLATEFKPLRLKLTFAHILFATNG  | 874  |
| Ps BRL1 | 812  | TKRRRRKKKFAA--LDG-YLDNSHSG-----NANNSGWKT-T-SAREALSI-NLATEFKPLRLKLTFAADLLAATNG | 874  |
| Nt BRL1 | 832  | TKRRRRKKKFAA--LEA-YMDGSFNS-----VTANSWKFT-S-SAREALSI-NLAAEFKPLRLKLTFAADLLAATNG | 894  |
| St BRL1 | 824  | TKRRRRKKKFAA--LEA-YMDGFS-----ATANSWKFT-S-SAREALSI-NLAAEFKPLRLKLTFAADLLAATNG   | 886  |
| cons    | 937  | * * * * *                                                                     | 1008 |
| At BRL1 | 883  | FHNDISI-GSGGFGDVYKATLDGSAVAIKKLI-IHVS-GGGRFFMAEMFTIKIKHRLNVPLI-GYCKVGGERILL   | 954  |
| At BRL1 | 859  | PSAETWSSGGGGEVYKAQLRDGSVAIKKLI-ITGODREFMAEMFTIKIKHRLNVPLI-GYCKVGGERILL        | 930  |
| At BRL2 | 838  | PSAASM-GHGGGGEVFKATLDGSAVAIKKLI-RLSCODREFMAEMFTIKIKHRLNVPLI-GYCKIGERILL       | 909  |
| ATBRL3  | 858  | PSADSM-GGCGGGEVYKATLDGSAVAIKKLI-OVTCODREFMAEMFTIKIKHRLNVPLI-GYCKIGERILL       | 929  |
| Os BRL1 | 807  | PHACOI-GSGGFGDVYKATLDGSAVAIKKLI-HVSGODREFMAEMFTIKIKHRLNVPLI-GYCKAGGERILL      | 878  |
| Os BRL1 | 912  | PSAEITLI-GSGGFGDVYKATLDGSAVAIKKLI-HFTGODREFMAEMFTIKIKHRLNVPLI-GYCKIGERILL     | 983  |
| Os BRL2 | 824  | FSTASIT-GSGGFGGEVFKATLDGSAVAIKKLI-HI-SYOGREFMAEMFTIKIKHRLNVPLI-GYCKIGERILL    | 895  |
| Os BRL3 | 913  | FCFATLI-GSGGFGGEVFKATLDGSAVAIKKLI-HI-SYOGREFMAEMFTIKIKHRLNVPLI-GYCKIGERILL    | 984  |
| Hv BRL1 | 804  | FHNDISLI-GSGGFGDVYKATLDGSAVAIKKLI-HVSGODREFMAEMFTIKIKHRLNVPLI-GYCKIGERILL     | 875  |
| GnBRL1a | 871  | FHNDISI-GSGGFGDVYKATLDGSAVAIKKLI-IHVS-GODREFMAEMFTIKIKHRLNVPLI-GYCKVGGERILL   | 942  |
| GnBRL1b | 874  | FHNDISI-GSGGFGDVYKATLDGSAVAIKKLI-IHVS-GODREFMAEMFTIKIKHRLNVPLI-GYCKVGGERILL   | 942  |
| GnBRL2a | 756  | PSAASLI-GCGGGEVFKATLDGSAVAIKKLI-RLSCODREFMAEMFTIKIKHRLNVPLI-GYCKVGGERILL      | 827  |
| GnBRL2b | 837  | PSAASLI-GCGGGEVFKATLDGSAVAIKKLI-RLSCODREFMAEMFTIKIKHRLNVPLI-GYCKVGGERILL      | 908  |
| GnBRL1a | 928  | PSASFIT-GSGGFGGEVFKATLDGSAVAIKKLI-IHVTGODREFMAEMFTIKIKHRLNVPLI-GYCKVGGERILL   | 999  |
| GnBRL1b | 912  | PSAESLI-GSGGFGGEVFKATLDGSAVAIKKLI-IHVTGODREFMAEMFTIKIKHRLNVPLI-GYCKIGERILL    | 983  |
| M BRL1  | 875  | FHNDISLI-GSGGFGDVYKATLDGSAVAIKKLI-IHVS-GODREFMAEMFTIKIKHRLNVPLI-GYCKVGGERILL  | 946  |
| Ps BRL1 | 875  | FHNDISI-GSGGFGDVYKATLDGSAVAIKKLI-IHVS-GODREFMAEMFTIKIKHRLNVPLI-GYCKVGGERILL   | 946  |
| Nt BRL1 | 895  | FHNDISI-GSGGFGDVYKATLDGSAVAIKKLI-IHVS-GODREFMAEMFTIKIKHRLNVPLI-GYCKVGGERILL   | 966  |
| St BRL1 | 887  | FHNDISLVSGGFGDVYKATLDGSAVAIKKLI-IHVS-GODREFMAEMFTIKIKHRLNVPLI-GYCKVGGERILL    | 958  |
| cons    | 1009 | * * * * *                                                                     | 1080 |
| At BRL1 | 955  | VYEFMYKGSLEDVLHDCK-K-AGVGLNWSRRKAI-IA-GAARGALFLHNCSPHII-HRDMKSSNVLLDENLEA     | 1023 |
| At BRL1 | 931  | VYFMYKWSITFTVHDFK-SKK-GGIYLNAAARKAI-IA-GAARGALFLHNCSPHII-HRDMKSSNVLLIDENFA    | 1001 |
| At BRL2 | 910  | VYFMYKWSITFEVHDFK-TGKERRI-I-GWFFRCKI-AGAARGCFI-HNCSPHII-HRDMKSSNVLLIDENFA     | 980  |
| ATBRL3  | 930  | VYEFMYKGSLEVLHEDK-KK-GGFLDWSARKAI-IA-GAARGALFLHNCSPHII-HRDMKSSNVLLIDENFA      | 999  |
| Os BRL1 | 879  | VYDMYKWSITFDVHDK-K-I-GKKI-NWARRKAI-AGAARGAFI-HNCSPHII-HRDMKSSNVLLIDENFA       | 947  |
| Os BRL1 | 984  | VYFMYKWSITDVIHDK-K-ASVKI-DWSARKAI-IA-GAARGAFI-HNCSPHII-HRDMKSSNVLLIDENFA      | 1052 |
| Os BRL2 | 896  | VYEFMHSGLEDLTHDGK-GSAPASVW-ORCKVARGAARGCFI-HNCSPHII-HRDMKSSNVLLIDENFA         | 966  |
| Os BRL3 | 985  | VYEFMNGSLDVLHDGK-E-ANMLDNWARRKAI-IA-GAARGALFLHNCSPHII-HRDMKSSNVLLIDENFA       | 1053 |
| Hv BRL1 | 876  | MDYFMYKWSITFDVHDK-K-I-GVRI-NWARRKAI-IA-GAARGAFI-HNCSPHII-HRDMKSSNVLLIDENFA    | 944  |
| GnBRL1a | 943  | VYEFMYKGSLEDVLHDCK-K-AGI-KLNAARRKAI-IA-GAARGALFLHNCSPHII-HRDM                 |      |

**Figure S1. Cont.**

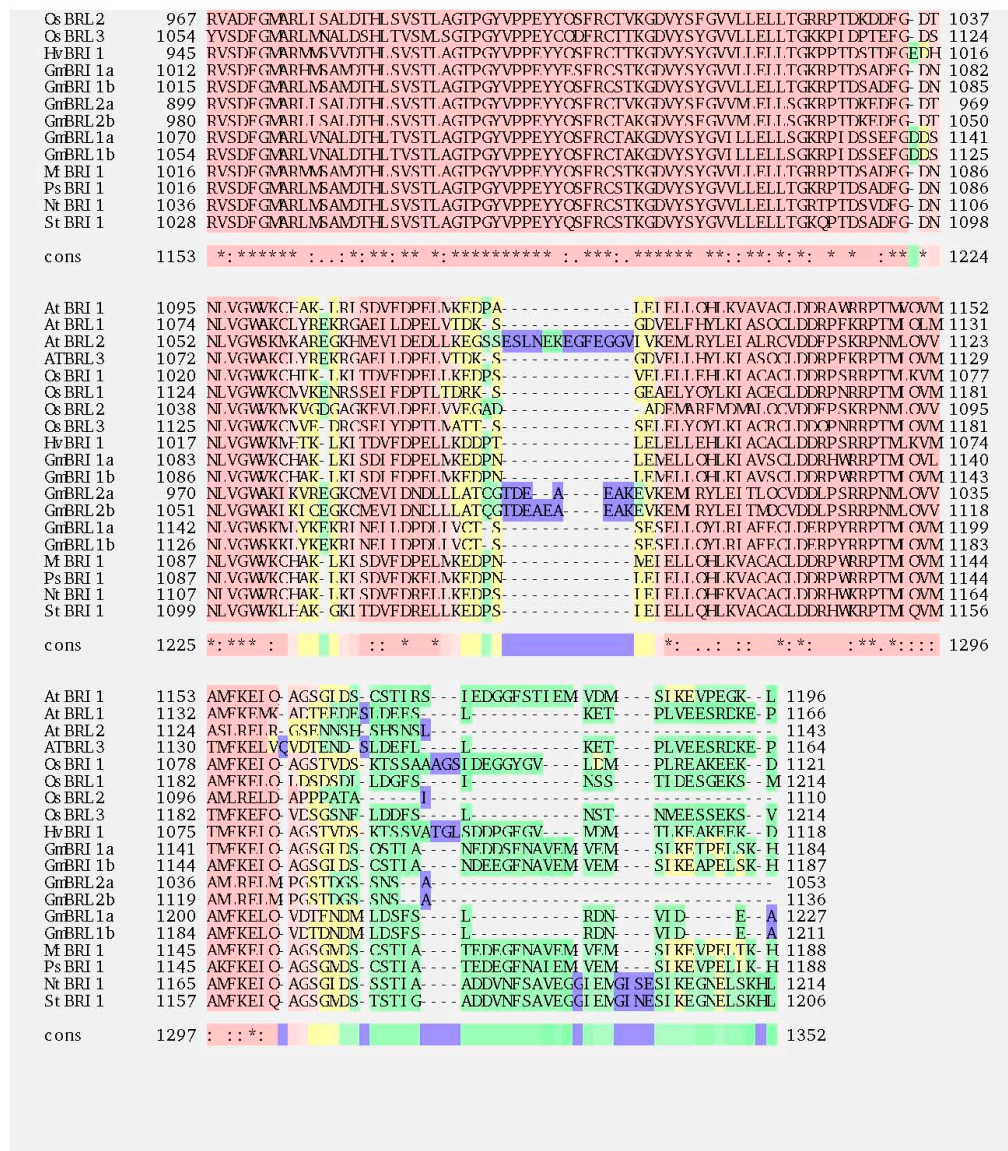

**Figure S1.** Alignment of the full amino acid sequences of the BR receptors from *Arabidopsis thaliana* (At), *Oryza sativa* (Os), *Glycine max* (Gm), *Solanum tuberosum* (St), *Medicago truncatula* (Mt), *Nicotiana tabacum* (Nt), and *Pisum sativum* (Ps). T-COFFEE V11.0 was used to construct the alignments [81]. The amino acid sequences that are identical in all aligned BR receptors are indicated with an asterisk (\*), sequences that are conserved are indicated with a dot (.) and (:).

## MSA

The multiple sequence alignment result as produced by T-coffee.

T-COFFEE, Version\_11.00.8cbe486 (2014-08-12 22:05:29 - Revision 8cbe486 - Build 477)

Cedric Notredame

SCORE=920

\*

\* BAD AVG GOOD

At BRI 1 : 85  
 At BRI 1 : 84  
 At BRI 3 : 84  
 GnBRI 1a : 86  
 GnBRI 1b : 88  
 GnBRI 1a : 82  
 GnBRI 1b : 82  
 GnBRI 2a : 84  
 GnBRI 2b : 84  
 Ps BRI 1 : 85  
 Os BRI 1 : 83  
 Hv BRI 1 : 83  
 Nt BRI 1 : 85  
 Sl BRI 1 : 89  
 cons : 92

```

At BRI 1 1 MKTFSSFF-----LS-----VTILFFSFSSLSF--QASPSCSLYREI 36
At BRI 1 1 MKCRVL-----LVLI-LCFFTSLVM--GI-FGKHLINDFNET 35
At BRI 3 1 MKCCVO-----FL-I-LCLIVIFITV--DS-RGRIISDFVNDT 34
GnBRI 1a 1 MKALYRSS-----L-----LLFFLS--VC--SASSSSVPT 27
GnBRI 1b 1 F-----ASSSSVPT 9
GnBRI 1a 1 MKHFSFKPQGEKMKRFKPYIMKKMPWSPRREAPIVVRFFV-IATFIMTVPTPTAA-DAEAFATTTSDA 70
GnBRI 1b 1 MRVKKGFK-----MKREKAYLRKMEWS-----ARRVVRFI-V-TAIFIT--TAAAFATNSDA 48
GnBRI 1a 1 MENNEVO-----FLPLLTVILLVI TVLFP-----VT-EG-AAVSSI KTDA 39
GnBRI 2a 1 MENNEVO-----LLVHLTVILLVI TVLFP-----LT-EGAAAVSSI KTDA 40
GnBRI 2b 1 MKPIYSTN-----TLIIIIATFIH-----LGPSSSSSSSSSTSS 36
Ps BRI 1 1 NDSLWAAL-----A-ALFVAAAVVV-----RGAAAADDA 28
Os BRI 1 1 NDCLRLAV-----A-AAALL--LA-----ALAAAADDA 25
Hv BRI 1 1 MKPHNSAMY-QHFSLNKI FL--LSFSLQP-----LFILLIIFFLP--PA--SPASVNGIFKDS 53
Sl BRI 1 1 VN-----GLYKDS 8

```

cons 1 . 72

```

At BRI 1 37 HOLI SFKEV-LP-D-KNLLPDVSSN-KNPCTFDGVTCD--D-KVTSIDLSSKP-LNVGFSAVSSSLSLT 99
At BRI 1 36 ALLLAFKCNVKSDDPNVNLGNVYSGRGSCSVRGVSCSD--G-RI-VGLDLRNSG-LTGILNL--VNLALP 102
At BRI 3 35 AIITAFKCTSIKSDPTNFI.GNRYGSGRDPCTVRGVSCSD--G-RVI-GIDIRNGG-LTGILNL--NNITAI.S 101
GnBRI 1a 28 I.CI.I.SFRNS-I-P-N-PTI.I.PNW.PN--CSPCFTGTICND--TCHI.TSIDI.SGVP-I.TNI.TVIATFI.I.TID 91
GnBRI 1b 10 CCLLSFRNS-LP-N-PSLLPNWLPN--CSPCTFSGISCND--T-ELTSIDLSSVP-LSTNLTVIASFLLSLD 72
GnBRI 1a 71 VI.I.I.CFKH.FVSSDPYSFI.SDWCPH-APSPCAWRGITCASS--G-GVSAID.SGAA-I.SGIT.HI--PTI.TSI.S 136
GnBRI 1b 49 I.I.I.I.HFKH.FVSSDPYSFI.SDWCPH-APSPCAWRGITCASS--G-DVTSIDI.GGAS-I.SGIT.FI--PII.TSI.P 115
GnBRI 2a 40 QALLMFKRMICKDPGVLSGVKLN--RNPSCWVGVSCTIL--G-RVTOLDISGSNDLAGTISL--LPLSSLD 103
GnBRI 2b 41 QALLMFKRMICKDPGVLSGVKLN--RNPSCWVGVSCTIL--G-RVTOLDISGSNDLAGTISL--LPLSSLD 104
Ps BRI 1 37 SCTI.YFKCS-I-P-N-PSI.I.HDW.PY--KNPCSFGTICND--T-TVTSIDI.TSIP-I.NINI.TVVATYI.I.TID 99
Os BRI 1 29 QLEEFRCV-LP-N-CAALKGVSOG--DGACRFPAGACRN--G-RLTSLSLAGVP-LNAEFRAVAATLLCLG 91
Hv BRI 1 26 QLLDEFRCV-LP-S-CAPLEGVTAR--EGACRFPAGACRN--G-RLTSLSLAGVP-LNAEFRAVAATLLCLG 88
Nt BRI 1 54 OCTI.SFRSS-I-P-NTCTCI.QNVI.SS--TDPCSFGTGVSCKN--S-RVSSI.DI.TNTF-I.SVDFTI.VSSYI.I.GI.S 117
Sl BRI 1 9 QQLSFRKA-LP-PTPILLQNLSS--TGPCSFGTGVSCKN--S-RVSSI.DI.TNTF-I.SVDFSLVTSYLLPLS 72

```

cons 73 \* \* : : \* \* . . \* : : : \* : \* \* 144

```

At BRI 1 100 GLESLFLSNHNGSV-----SGFKCSASLTSLDLSSNS-LSG-PVTTLTSL-GSCSGLKFLNVSSNTLDF 162
At BRI 1 103 NLQNYLOGNYFSSGGD-----SSGSDCYLOVLDLSSNS-ISDYSMVD-YVF-SKCSNLVSVNI.SNNKLVG 165
At BRI 3 102 NLRSIYICGNFSSGDS-----SSSGCSIFVIFDI.SSNS-ITDSI.VD-YVF-STCI.NI.VSVNF.SNNKLVG 164
GnBRI 1a 92 NLRSIYIKSTNLSGPAAMPPI.SHSKCASTITSLDI.SNA-LSG-SINEMFI-SSCSNLSI.NI.SNNI.I.FF 160
GnBRI 1b 73 HLCSLSKSTNLSGPAAMPPLSHSCSSSLTSLDLSSNS-LSA-SINEMFI-ASCSNLSI.NI.SNNI.I.FF 140
GnBRI 1a 137 SIQNI.I.LRGNSFSFNL-----TVSPICIT.FITDI.SHN-FSG-KFPF-ANI-APCI.RI.SYI.NI.SNNI.I.FF 198
GnBRI 1b 116 SLQNI.I.LRGNSFSFNL-----TVSPICITQLDLSHNN-FSG-KFPF-ADF-APCNRLSYL.NI.SNNI.I.FF 177

```

Figure S2. Cont.

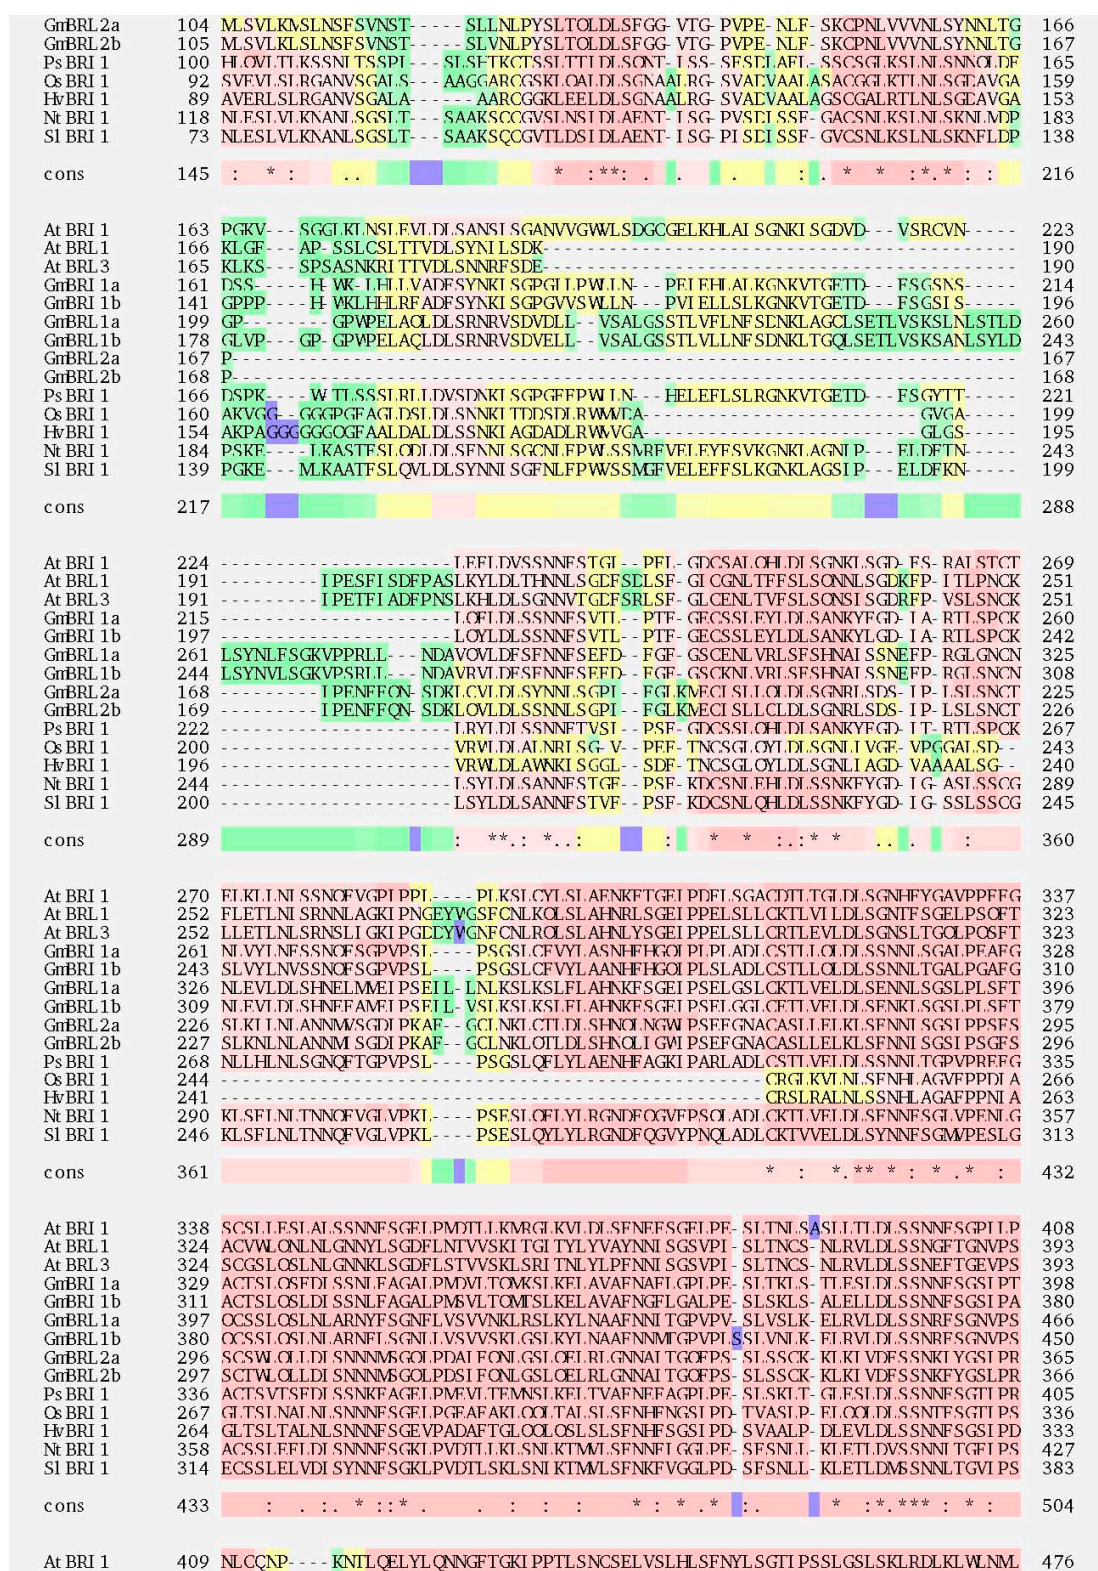

**Figure S2. Cont.**

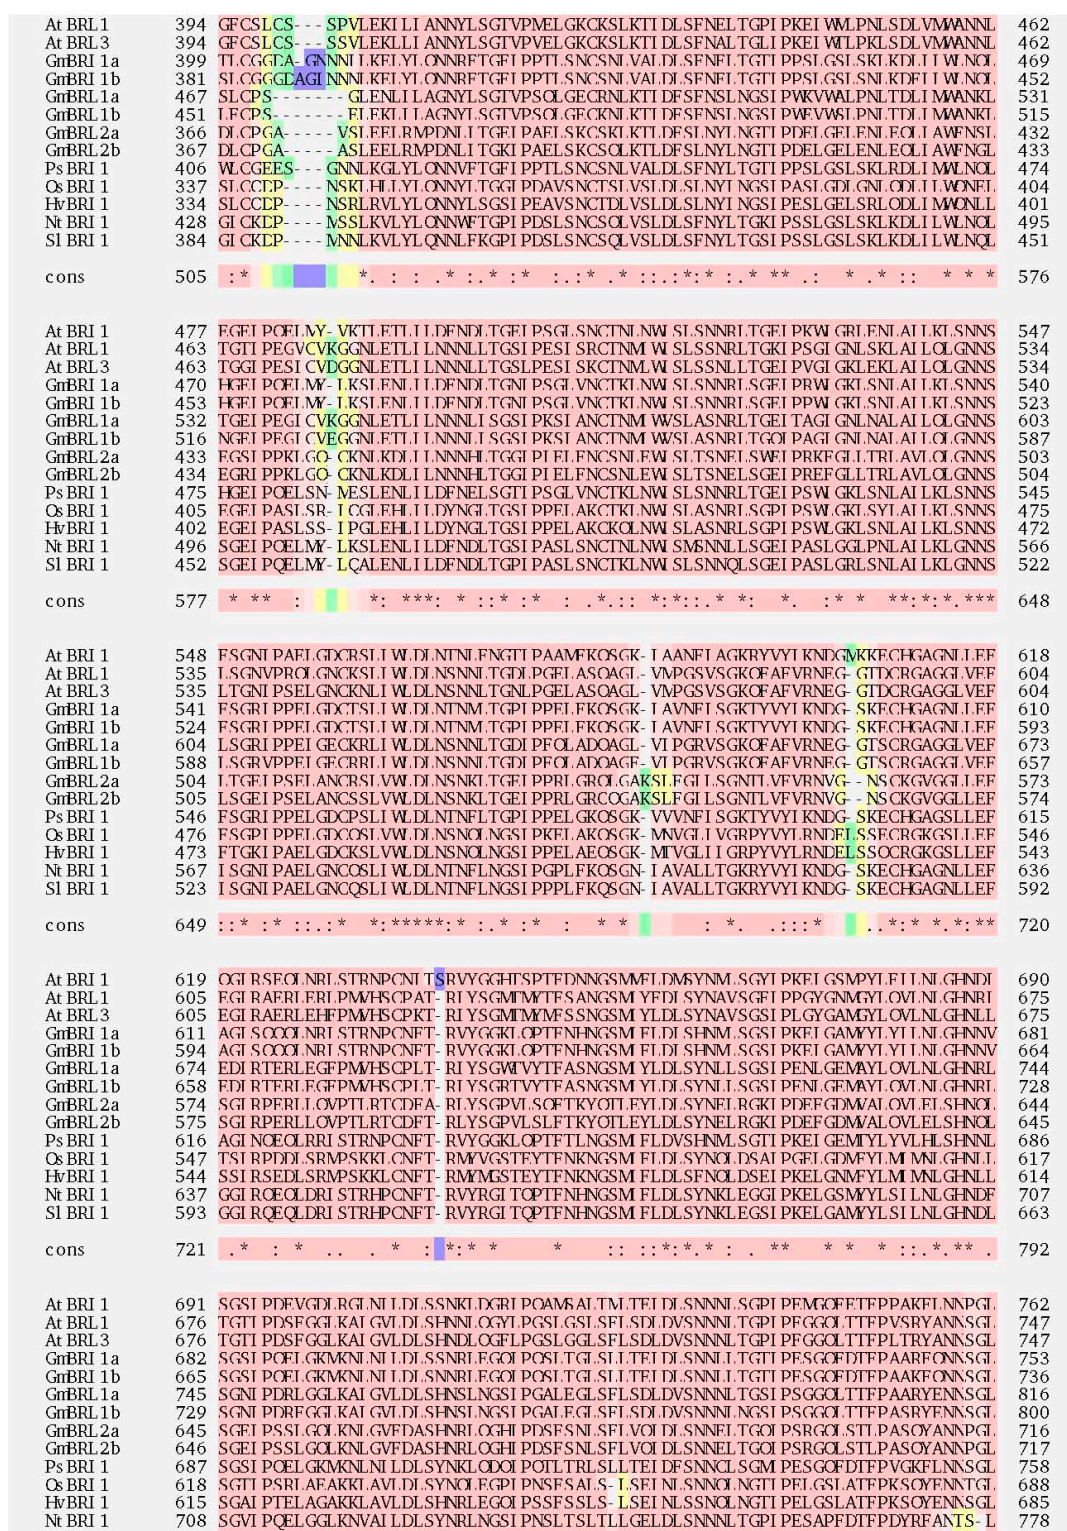

**Figure S2.** Alignment of the ectodomains of the BR receptors from *Arabidopsis thaliana* (At), *Oryza sativa* (Os), *Glycine max* (Gm), *Solanum lycopersicum* (Sl), *Nicotiana tabacum* (Nt), *Pisum sativum* (Ps), and *Hordeum vulgare* (Hv). T-COFFEE V11.0 was used to construct the alignments [81]. The amino acid sequences that are identical in all aligned BR receptors are indicated with an asterisk (\*), sequences that are conserved are indicated with a dot (.) and (:).

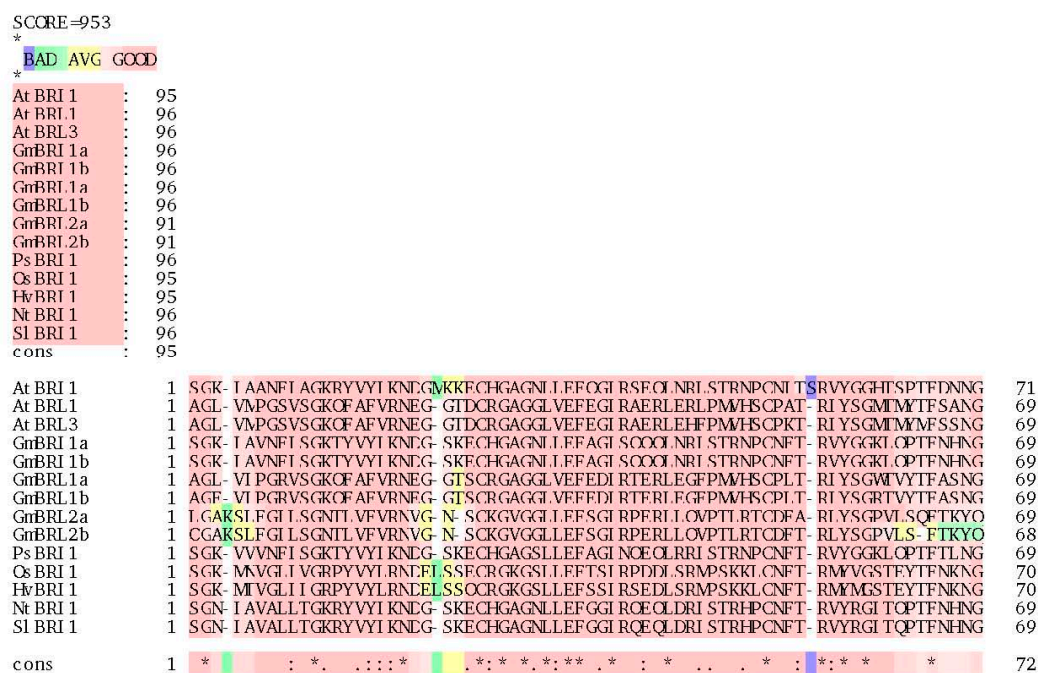

**Figure S3.** Alignment of the island domain sequences of the BR receptors from *Arabidopsis thaliana* (At), *Oryza sativa* (Os), *Glycine max* (Gm), *Solanum lycopersicum* (Sl), *Nicotiana tabacum* (Nt), *Pisum sativum* (Ps), and *Hordeum vulgare* (Hv). T-COFFEE V11.0 was used to construct the alignments [81]. The amino acid sequences that are identical in all aligned BR receptors are indicated with an asterisk (\*), sequences that are conserved are indicated with a dot (· and :).

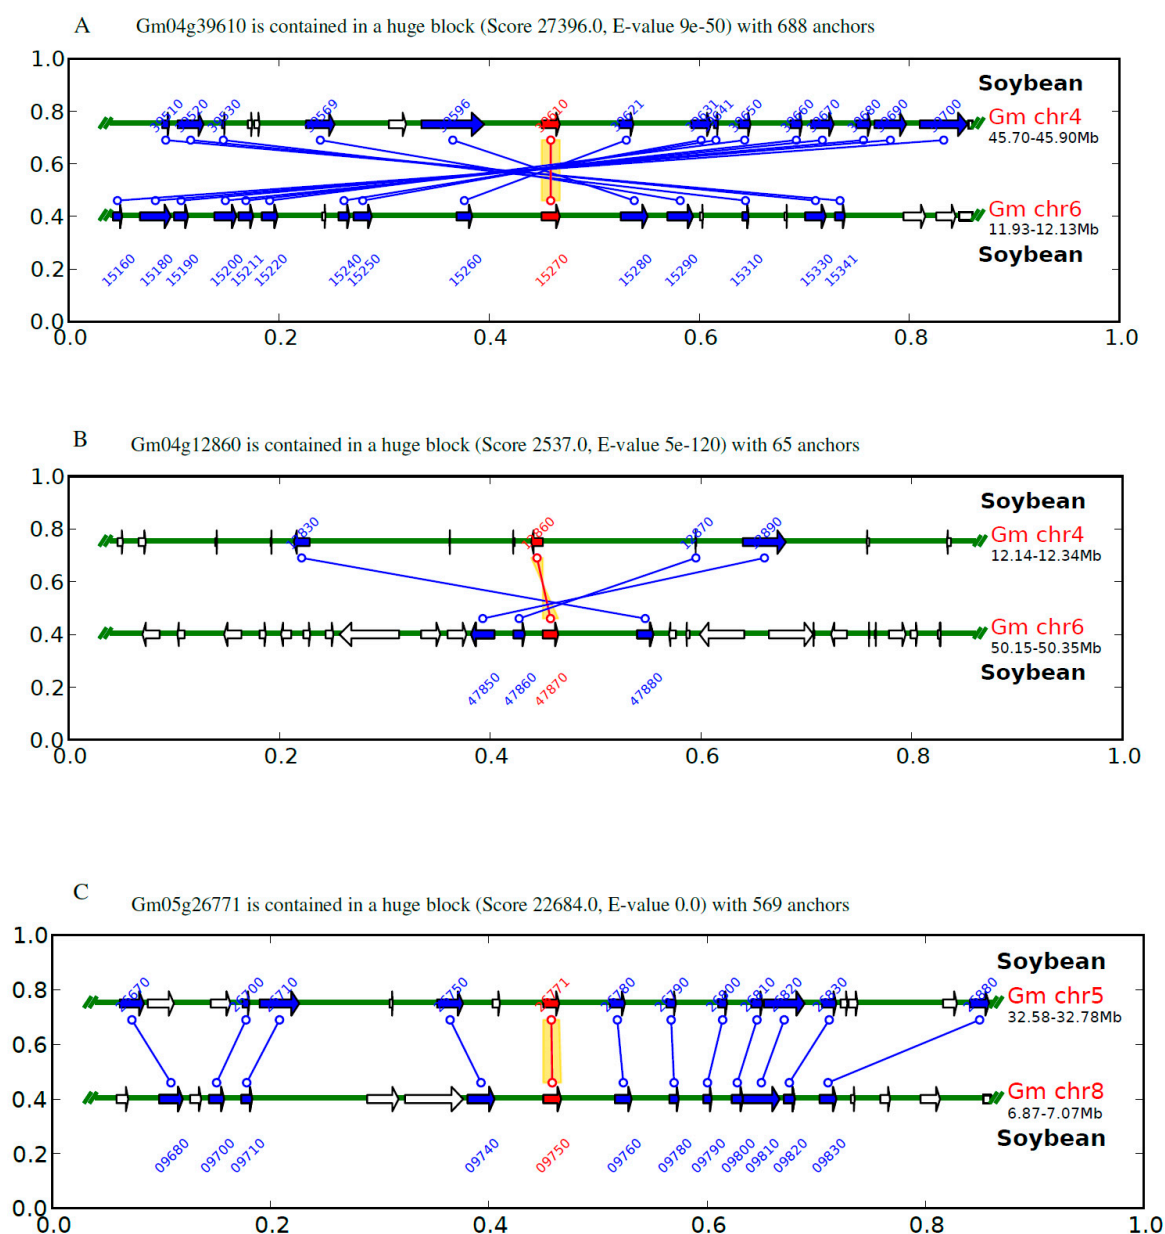

**Figure S4.** Duplication analysis of the BR receptor genes in soybean. Three gene duplication events can be found in soybean, *Glyma04g39610* (*GmBRI1b*) to *Glyma06g15270* (*GmBRI1a*) (A); *Glyma04g12860* (*GmBRL1a*) to *Glyma06g47870* (*GmBRL1b*) (B); and *Glyma05g26771* (*GmBRL2a*) to *Glyma08g09750* (*GmBRL2b*) (C). The intra-species blocks for *GmBRI1a*, *GmBRL1a*, and *GmBRL2a* are shown in A, B, and C, respectively. Graphs display 100-kb regions. Blue arrows indicate the other anchor genes in the region, red indicates the query locus.

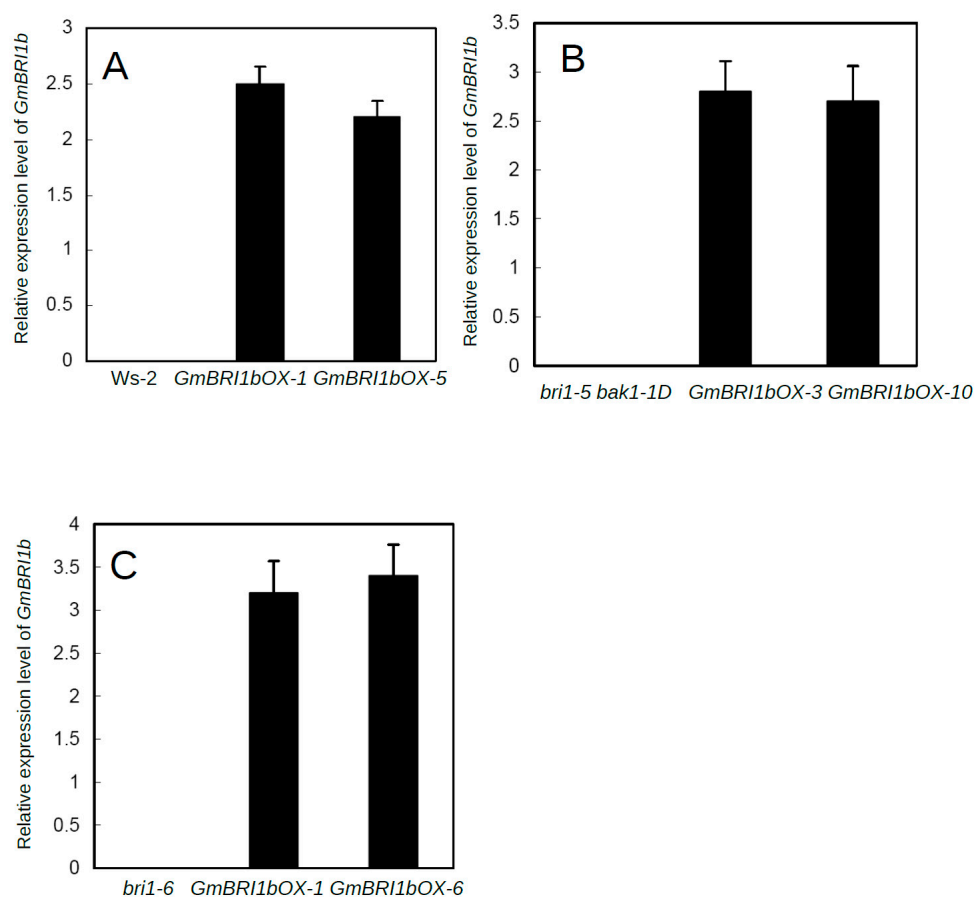

**Figure S5.** The relative expression levels of *GmBRI1b* in transgenic lines in Ws-2 (A), *bri1-5 bak1-1D* (B), and *bri1-6* (C) background, respectively. Quantitative real-time PCR was used to determine the relative transcription levels of *GmBRI1b* in transgenic lines. *AtEF-1a* was used to normalize the relative expression levels of *GmBRI1b*. Results are means  $\pm$  SD from three independent experiments.
